# Supplementary material for: Short loop-targeting oligoribonucleotides antagonize Lin28 and enable pre-let-7 processing and suppression of cell growth in let-7-deficient cancer cells
Source: PubMed Central journal article supplement — Nucleic Acids Res. 2014 Nov 6;43(2):e9. doi: 10.1093/nar/gku1090 (PMC4333367; doi:10.1093/nar/gku1090), 2014-11-06
Supplement: supp_gku1090_nar-02363-met-g-2014-File005.pdf [file supp_gku1090_nar-02363-met-g-2014-File005.pdf]

**Short loop-targeting oligoribonucleotides antagonize Lin28 and enable pre-let-7 processing and suppression of cell growth in let-7 deficient cancer cells.**

Martina Roos<sup>1</sup>, Mario A. E. Rebhan<sup>1</sup>, Matije Lucic<sup>1</sup>, David Pavlicek<sup>1</sup>, Ugo Pradere<sup>1</sup>, Harry Towbin<sup>1</sup>, Gianluca Civenni<sup>2</sup>, Carlo V. Catapano<sup>2</sup>, Jonathan Hall<sup>1\*</sup>

## Supplementary Materials

| Tables and Figures                                                                                                                                                                       | Page |
|------------------------------------------------------------------------------------------------------------------------------------------------------------------------------------------|------|
| Table S1: Sequences of oligonucleotides, masses calculated and masses observed                                                                                                           | 3    |
| Figure S1: Looptomirs assayed for binding to truncated biotinylated pre-let-7a-2 bound to the surface of a streptavidin-coated biosensor by surface plasmon resonance (SPR) spectroscopy | 4    |
| Figure S2: Inhibition by looptomirs of Lin28A binding to immobilized pre-let-7a-2.                                                                                                       | 4    |
| Figure S3: Looptomirs inhibit Lin28A binding (upper panel) but not hnRNPA1 to pre-let-7a-2.                                                                                              | 5    |
| Figure S4: Cellular localization of Cy5-labelled <b>L29-13</b> in Huh7 cells.                                                                                                            | 5    |
| Figure S5: Detection of endogenous Lin28B by immunofluorescence in HepG2 and Huh7 cells                                                                                                  | 6    |
| Figure S6: Levels of mature let-7a 48 h after transfections of L29-13, L30-14 and Lcon                                                                                                   | 6    |
| Figure S7 Uncropped Western blot membranes showing Lin28B and B-Actin in HepG2 lysates                                                                                                   | 7    |
| Figure S8: Western blot showing levels of let-7 target Lin28B after treatment of HepG2 cells                                                                                             | 7    |
| Figure S9 Secondary structures of pre-miR-18a, pre-mir-122 and pre-let-7a-2.                                                                                                             | 8    |

Table S1: Sequences of oligonucleotides used in the study, masses calculated and masses observed.

| Oligoribonucleotide name                                          | Sequence 5' -> 3'                                                                                                                                                                                                                       | Type       | Mass calc. [g/mol] | Mass obs [g/mol] |
|-------------------------------------------------------------------|-----------------------------------------------------------------------------------------------------------------------------------------------------------------------------------------------------------------------------------------|------------|--------------------|------------------|
| Let-7a-2 total complementary + primer + restriction sites         | CCTCCACTTCAGCCAGGACTCGAGTTTTTCATTTTGAAG<br>GGGCCTCACCGAGTGGGGGCATCATCAAAAACTTTAA<br>CTATACAACCTACTACCTCAGGAGTCCCCTCACCTCCT<br>CTAAGGTTGGGCAGGGTGACCCTGAAGTGAGCACAG<br>CCTAGGGCTGAGCTGGGGACCTGGT <u>GCGGCCGCTGA</u><br>GTCTTCGGACCTCGC   | DNA        | -                  | -                |
| Let-7a-2 total complementary mutated + primer + restriction sites | CCTCCACTTCAGCCAGGACTCGAGTTTTTCATTTTGAAG<br>GGGCCTCACCGAGTGGGGGCATCATCAAAAACTTTAA<br>CTATACAACCTACGAACGCAGGAGTCCCCTCACCTCC<br>TCTAAGGTTGGGCAGGGTGACCCTGAAGTGAGCACACA<br>GCCTAGGGCTGAGCTGGGGACCTGGT <u>GCGGCCGCTG</u><br>AGTCTTCGGACCTCGC | DNA        | -                  | -                |
| Pre-let-7a-2 T7 DNA template                                      | GGAAAGCTAGGAGGCTGTACAGTTATCTCCCTTGATG<br>TAATTCTAAACTATAACCTACTACCTCCTATAGTGA<br>GTCGTATTAGGATCC                                                                                                                                        | DNA        | -                  | -                |
| T7 DNA Polymerase Promotor                                        | GGATCCTAATACGACTCACTATAG                                                                                                                                                                                                                | DNA        | -                  | -                |
| siRNA lin28b5'                                                    | AAAUCCUCCAUGAAUAGUTT                                                                                                                                                                                                                    | RNA/DNA    | 6852               | -                |
| siRNA lin28b3'                                                    | ACUAUUCAUGGAAGGAUUUTT                                                                                                                                                                                                                   | RNA/DNA    | 6909               | -                |
| siRen 5'                                                          | GAGCGAAGAGGGCGAGAAUUU                                                                                                                                                                                                                   | RNA        | 6901.31            | 6902.5           |
| siRen 3'                                                          | UUUCUCGCCCUUCUCUCUUU                                                                                                                                                                                                                    | RNA        | 6436.78            | 6436.2           |
| Pre-let-7a-2                                                      | UGAGGUAGUAGGUUGUAUAGUUUAGAAUUACAUCAA<br>GGGAGAUAAACUGUACAGCCUCCUAGCUUUC                                                                                                                                                                 | RNA        | 21'502.9           | 21'503.3         |
| Pre-mir-18a + Biotin(X)                                           | UAAGGUGCAUCUAGUGCAGAUAGUGAAGUAGAUUAG<br>CAUCUACUGCCCUAAGUGCUCUUCUGGX                                                                                                                                                                    | RNA        | -                  | -                |
| Pre-mir-122 + Biotin (X)                                          | UGGAGUGUGACAAUGGUGUUUGUGUCUAAACUAUCA<br>AACGCCAUUAUCACACUAAAUAX                                                                                                                                                                         | RNA        | -                  | -                |
| Pre-let-7a-2 truncated + linker + Biotin(X)                       | AGGUUGUAUAGUUUAGAAUUACAUCAAGGGAGAUAA<br>CUGUACAGCCUCTTTTTTUX                                                                                                                                                                            | RNA/DNA    | 18'039.3           | 18'039.6         |
| Lcon                                                              | AUGUAGUCCCCUC                                                                                                                                                                                                                           | 2'-OMe RNA | 4'220.8            | 4'220.1          |
| L35-09                                                            | AUCUCCCUU                                                                                                                                                                                                                               | 2'-OMe RNA | 2'838.9            | 2'838.3          |
| L33-11                                                            | AUCUCCCUUGA                                                                                                                                                                                                                             | 2'-OMe RNA | 3'541.4            | 3'540.8          |
| L31-13                                                            | AUCUCCCUUGAUG                                                                                                                                                                                                                           | 2'-OMe RNA | 4'220.8            | 4'220.1          |
| L31-09                                                            | CCCUUGAUG                                                                                                                                                                                                                               | 2'-OMe RNA | 2'918.0            | 2'917.2          |
| L30-14                                                            | AUCUCCCUUGAUGU                                                                                                                                                                                                                          | 2'-OMe RNA | 4'541.0            | 4'540.3          |
| L30-13                                                            | UCUCCCUUGAUGU                                                                                                                                                                                                                           | 2'-OMe RNA | 4'197.8            | 4'197.1          |
| L29-13                                                            | CUCCCUUGAUGUA                                                                                                                                                                                                                           | 2'-OMe RNA | 4'220.8            | 4'220.2          |
| L29-13 + Cy5-label                                                | CUCCCUUGAUGUA                                                                                                                                                                                                                           | 2'-OMe RNA | 4833.61            | 4832.8           |
| L29-09                                                            | CUUGAUGUA                                                                                                                                                                                                                               | 2'-OMe RNA | 2'943.0            | 2'942.4          |
| General primer 1 forward                                          | CCTCCACTTCAGCCAGGA                                                                                                                                                                                                                      | DNA        | -                  | -                |
| General primer 1 revers                                           | GCGAGGTCCGAAGACTCA                                                                                                                                                                                                                      | DNA        | -                  | -                |

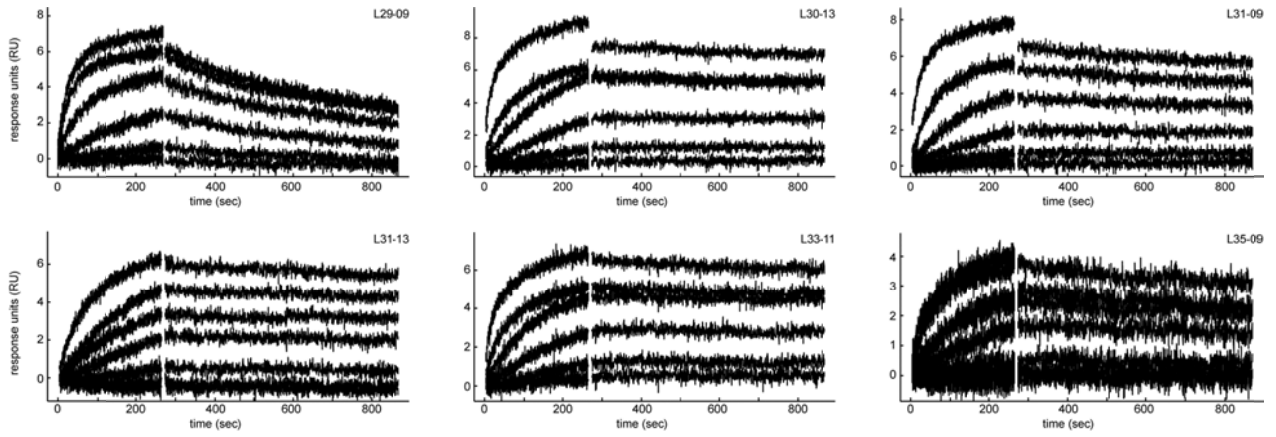

Fig. S1: Looptomirs assayed for binding to truncated biotinylated pre-let-7a-2 bound to the surface of a streptavidin-coated biosensor by surface plasmon resonance (SPR) spectroscopy.

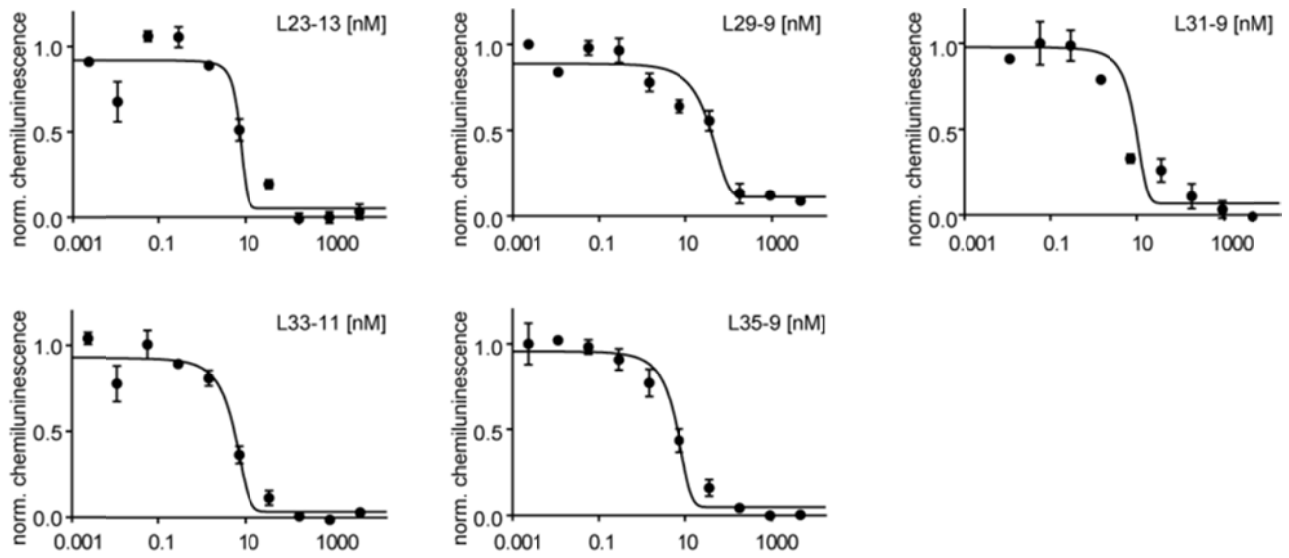

Fig. S2: Inhibition by looptomirs of Lin28A binding to immobilized pre-let-7a-2 (see Fig. 1 in main document).

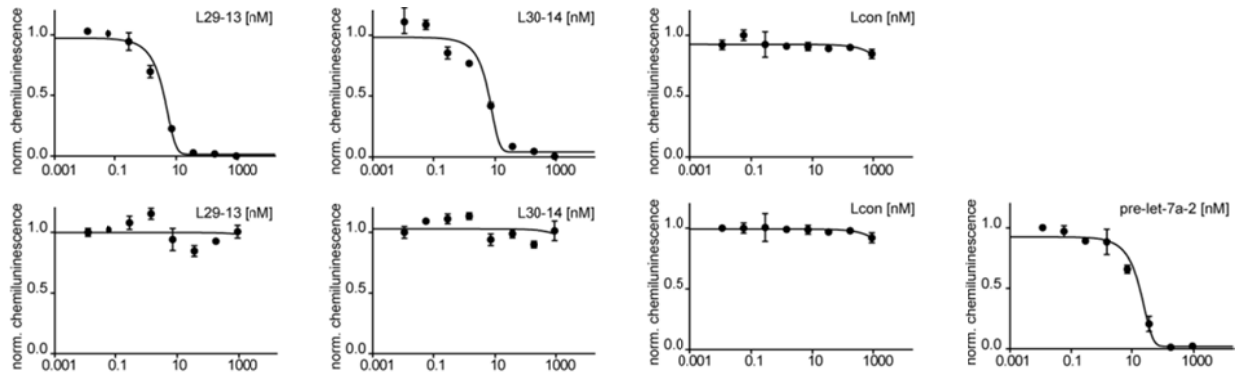

Fig. S3 Binding curves of looptomirs inhibiting Lin28 binding (upper panel) but not hnRNPA1 (lower panel) to pre-let-7a-2. The binding curves of the two proteins were assed in parallel.

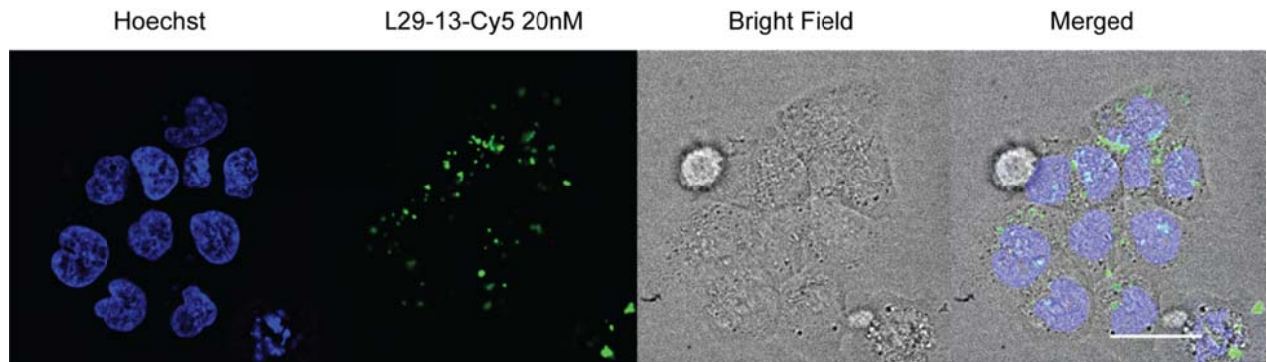

Figure S4: Cellular localization of looptomirs. Huh7 cells were transfected with Cy5-labelled **L29-13** (Table S1) at 20 nM concentrations under standard conditions (See Methods). **L29-13** accumulates in the nucleus and the cytoplasm 12 h post transfection as shown by live fluorescence images of **L29-13** (in green). Scale bar indicate 15  $\mu$ m; picture post processing details are given in Materials and Methods.

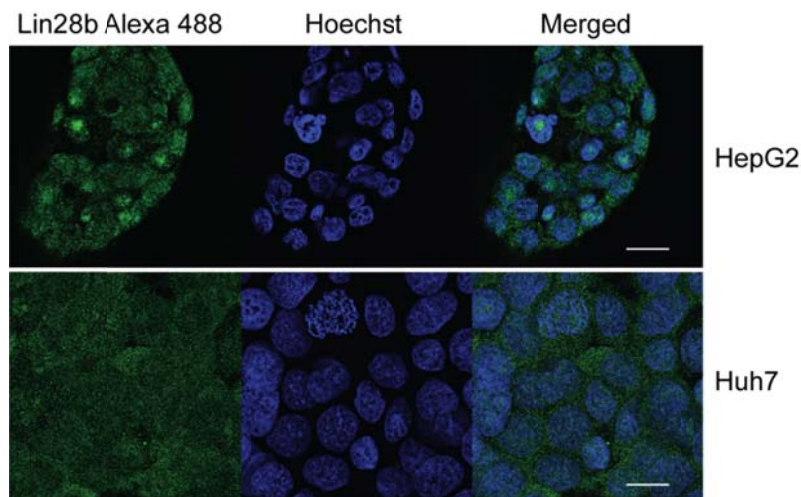

Figure S5: Detection of endogenous Lin28B (in green) by immunofluorescence in HepG2 and Huh7 cells; scale bars indicate 15  $\mu$ m. Picture post processing details are given in Materials and Methods.

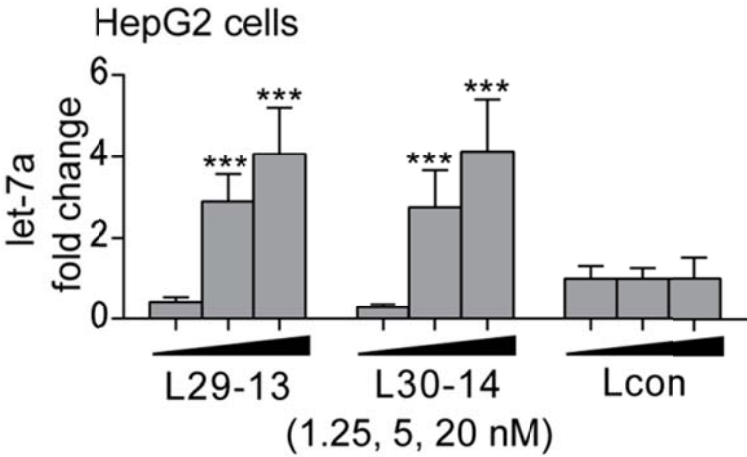

Figure S6: Endogenous levels of mature let-7a 48 h after transfections of **L29-13**, **L30-14** and **L<sub>con</sub>** into liver HepG2 cells, measured by TaqMan RT-qPCR (normalized to **L<sub>con</sub>**).

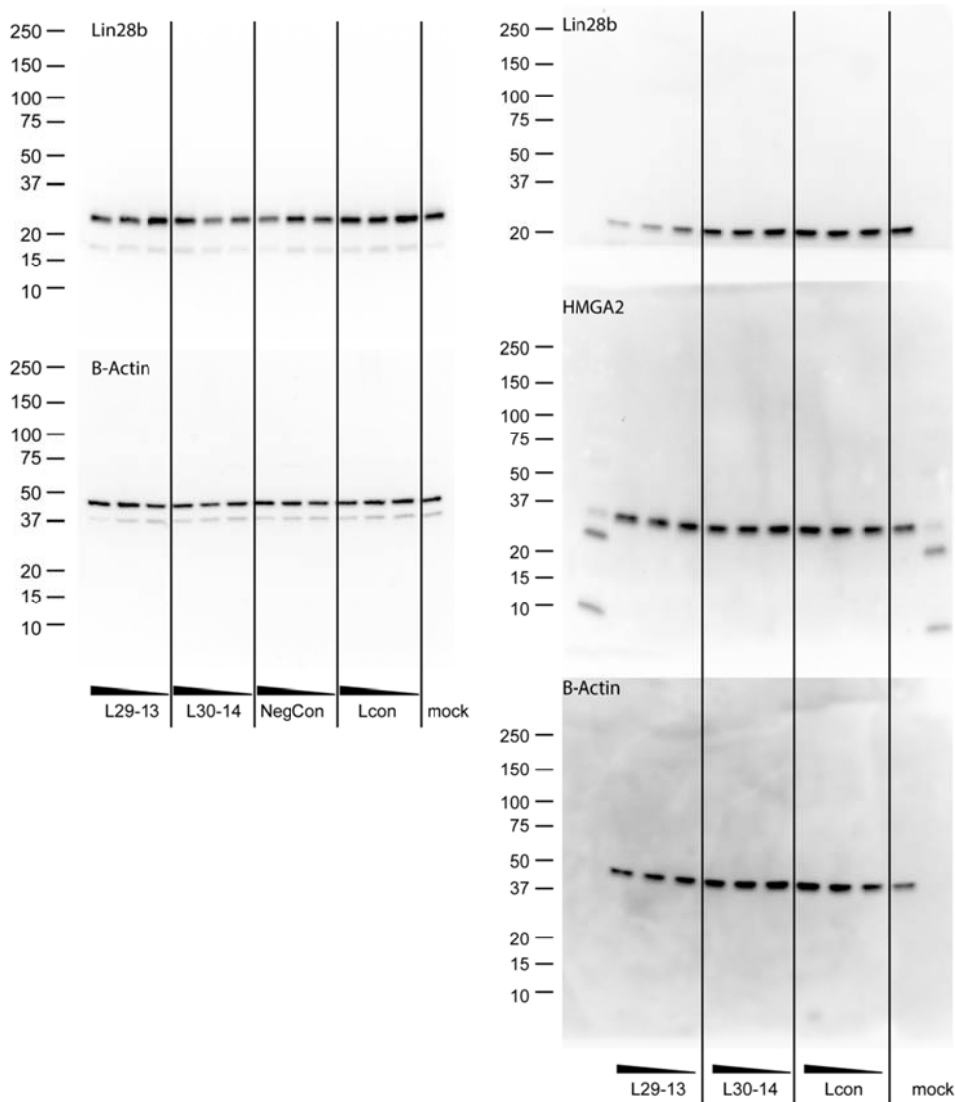

Figure S7 Uncropped Western blot membranes showing Lin28B and B-Actin detection in HepG2 cell lysate and Lin28B, HMGA2 and B-Actin detection in Huh7 cell lysate.

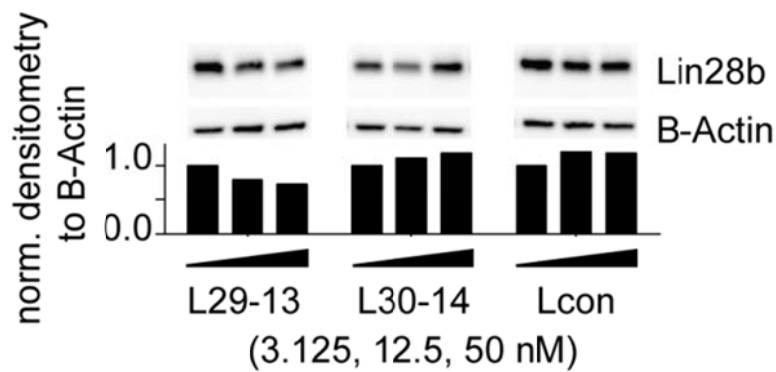

Figure S8: Western blot showing levels of let-7 target protein Lin28B after treatment of HepG2 cells with loptomirs. Uncropped pictures are shown in Fig. S7

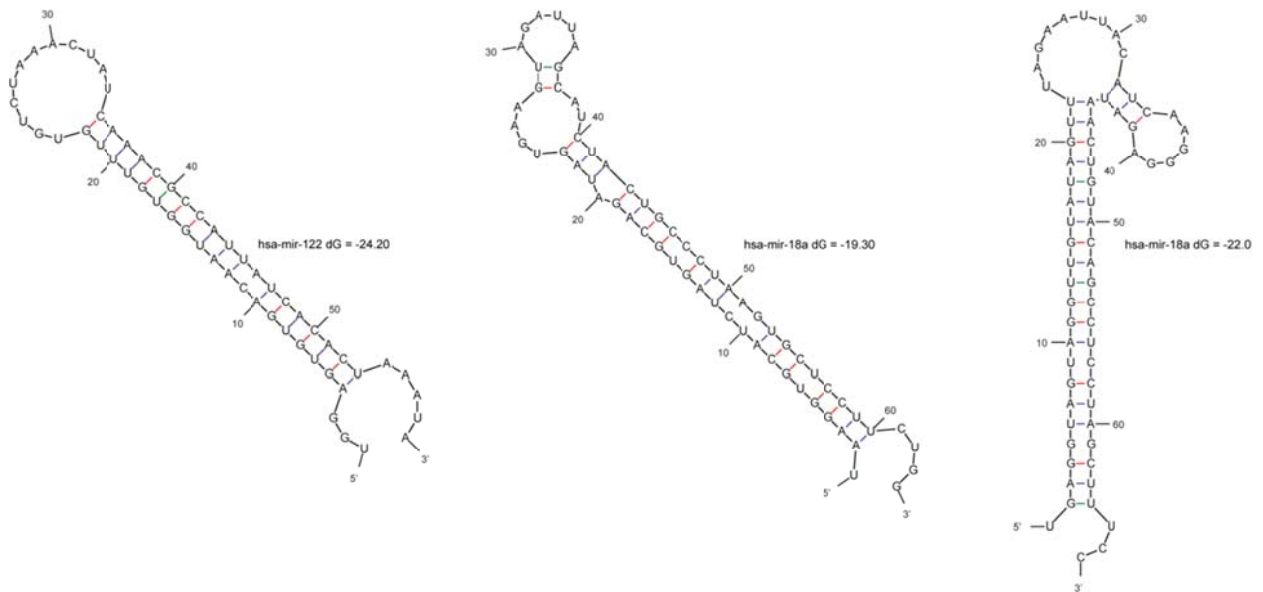

Fig. S9: Secondary structures of pre-miR-18a, pre-mir-122 and pre-let-7a-2 as predicted by Mfold (Waugh et al., 2002; Zuker, 2003; Zuker and Jacobson, 1998)).

## Literature

Waugh, A., Gendron, P., Altman, R., Brown, J.W., Case, D., Gautheret, D., Harvey, S.C., Leontis, N., Westbrook, J., Westhof, E., *et al.* (2002). RNAML: a standard syntax for exchanging RNA information. *RNA* 8, 707-717.

Zuker, M. (2003). Mfold web server for nucleic acid folding and hybridization prediction. *Nucleic Acids Res* 31, 3406-3415.

Zuker, M., and Jacobson, A.B. (1998). Using reliability information to annotate RNA secondary structures. *RNA* 4, 669-679.
